# Supplementary material
Source: publisher figshare collection journal article supplement (https://karger.figshare.com/ndownloader/files/28959711)
Supplement: Supplementary file 1 [file 28959711]

Table1. Sequences of primers used for qPCR.

| Genes | Primer sequences | |
| --- | --- | --- |
| H19 | Forward (5’-3’): | CGTTCCTTTAGTCTCCTGAC |
| Reverse (5’-3’): | AGTCCGTGTTCCAAGTCC |
| GAPDH | Forward (5’-3’): | ACAACTTTGGTATCGTGGAAGG |
| Reverse (5’-3’): | GCCATCACGCCACAGTTTC |
| MYC | Forward (5’-3’): | CCACAGCAAACCTCCTCACAG |
| Reverse (5’-3’): | GCAGGATAGTCCTTCCGAGTG |
| SOX4 | Forward (5’-3’): | AGCGACAAGATCCCTTTCATTC |
| Reverse (5’-3’): | CGTTGCCGGACTTCACCTT |
| CCND2 | Forward (5’-3’): | TTTGCCATGTACCCACCGTC |
| Reverse (5’-3’): | AGGGCATCACAAGTGAGCG |
| TCF7 | Forward (5’-3’): | CTGGCTTCTACTCCCTGACCT |
| Reverse (5’-3’): | ACCAGAACCTAGCATCAAGGA |
| Axin2 | Forward (5’-3’): | GTTTTTTTGGAGTTGATGGTAT |
| Reverse (5’-3’): | AAATCTAAACTCCCTACACACTT |
| HES1 | Forward (5’-3’): | ACGTGCGAGGGCGTTAATAC |
| Reverse (5’-3’): | GGGGTAGGTCATGGCATTGA |
| NRARP | Forward (5’-3’): | GTTCGCTGTTGCTGGTGTTC |
| Reverse (5’-3’): | TTGACCACGCAGTGTTTTCC |
| HES6 | Forward (5’-3’): | AGCAGGAGCCTGACTCAGTT |
| Reverse (5’-3’): | AGCTCCTGAACCATCTGCTC |
| HEY1 | Forward (5’-3’): | GTTCGGCTCTAGGTTCCATGT |
| Reverse (5’-3’): | CGTCGGCGCTTCTCAATTATTC |
| MMP2 | Forward (5’-3’): | ATCCTATGACAGCTGCACCAC |
| Reverse (5’-3’): | CACCTTCTGAGTTCCCACCAA |
| TWIST1 | Forward (5’-3’): | GGGCCGGAGACCTAGATG |
| Reverse (5’-3’): | TTTCCAAGAAAATCTTTGGCATA |
| HIF1a | Forward (5’-3’): | GAACGTCGAAAAGAAAAGTCTCG |
| Reverse (5’-3’): | CCTTATCAAGATGCGAACTCACA |
| VEGF | Forward (5’-3’): | ATCACGAAGTGGTGAAGTTC |
| Reverse (5’-3’): | TGCTGTAGGAAGCTCATCTC |
| GLI1 | Forward (5’-3’): | TTCCTACCAGAGTCCCAAGT |
| Reverse (5’-3’): | CCCTATGTGAAGCCCTATTT |
| GLI3 | Forward (5’-3’): | GAAGTGCTCCACTCGAACAGA |
| Reverse (5’-3’): | GTGGCTGCATAGTGATTGCG |
| E-cadherin | Forward (5’-3’): | TGCCCAGAAAATGAAAAAGG |
| Reverse (5’-3’): | GTGTATGTGGCAATGCGTTC |
| Vimentin | Forward (5’-3’): | GACGCCATCAACACCGAGTT |
| Reverse (5’-3’): | CTTTGTCGTTGGTTAGCTGGT |
| ZEB1 | Forward (5’-3’): | AAGAATTCACAGTGGAGAGAAGCCA |
| Reverse (5’-3’): | CGTTTCTTGCAGTTTGGGCATT |

Table 2. sequences of shRNA against H19

| shH19-1 | 5’-3’ | UAAGUCAUUUGCACUGGUU |
| --- | --- | --- |
| shH19-2 | 5’-3’ | CCAACAUCAAAGACACCAU |
